# Supplementary material
Source: publisher figshare collection journal article supplement (https://acs.figshare.com/ndownloader/files/10490341)
Supplement: Supplementary file 1 [file 10490341]

*Supporting Information*

Photo-Induced Electron Transfer-Based Versatile Platform with G-quadruplex/Hemin Complex as Quencher for Construction of DNA Logic Circuits

Shuang Wang,<sup>†,‡</sup> Jian Sun,<sup>†</sup> Jiahui Zhao,<sup>†,§</sup> Shasha Lu,<sup>†,‡</sup> and Xiurong Yang<sup>\*,†</sup>

<sup>†</sup>State Key Laboratory of Electroanalytical Chemistry, Changchun Institute of Applied Chemistry, Changchun, Jilin 130022, China

<sup>‡</sup> University of Science and Technology of China, Hefei, Anhui 230026, China

<sup>§</sup> University of Chinese Academy of Sciences, Beijing 100039, China

\*Fax: +86 431 85689278. E-mail: [xryang@ciac.ac.cn](mailto:xryang@ciac.ac.cn)

**Table S1.** All Sequences used in this experiment.

| DNA sequences | 5'-3'                                                                       |
|---------------|-----------------------------------------------------------------------------|
| SGMB          | ROX-TTGGGTAGGGTCCTTTGTTTGTCGGGTGTTGGG                                       |
| SGMB'         | ROX-AACCCATCCCAGGAAACAAACAGCCCAACCC                                         |
| SGMB-a        | TCCTTTGTTTGT                                                                |
| TAMRA         | TAMRA-TTGGGTAGGGTCCTTTGTTTGTCGGGTGTTGGG                                     |
| CY5           | CY5- TTGGGTAGGGTCCTTTGTTTGTCGGGTGTTGGG                                      |
| Texas Red     | Texas Red-TTGGGTAGGGTCCTTTGTTTGTCGGGTGTTGGG                                 |
| S1'           | CCCGACAAACAAAGGACCT                                                         |
| S1            | AGGGTCCTTTGTTTGTCGGG                                                        |
| S2'           | GGACCCTACCCAATGG                                                            |
| S3'           | CCCAACCCGACAA                                                               |
| OR1           | S2'                                                                         |
| OR2           | S3'                                                                         |
| AND1          | TTTTTTTTTTTGGGTACCGACAAACAAAGG <u>GGTACCCAAAAAAAAAAAA</u><br><u>TCACTA</u>  |
| AND2          | ATCGCTAGTGATTTTTTTTTTTGGGTACC                                               |
| INHIBIT1      | S1'                                                                         |
| INHIBIT2      | S1                                                                          |
| XOR1          | <u>ATCTCATCTCAGTACCCCAACCCGATTGCTGTGTCATAC</u>                              |
| XOR2          | <u>GTATGACACAGCAACCCCAACCCGAGTACTGAGATGAGAT</u>                             |
| INHIBIT-OR1   | S1'                                                                         |
| INHIBIT-OR2   | S1                                                                          |
| INHIBIT-OR3   | S2'                                                                         |
| Na            | TTTTTTTTTTTGGGTACCC <u>CCCAACCCGA</u> GGTACCCAAAAAAAAAAAAATC<br>ACTACTAGTC  |
| Nb            | <u>ATCTCATCTCAGTACTAGTGATTTTTTTTTTTGGGTACCTTGCTGTGTCA</u><br><u>TAC</u>     |
| Nc            | TTTTTTTTTTTGGGTACCC <u>CCCAACCCGA</u> GGTACCCAAAAAAAAAAAAATC<br><u>ACTA</u> |
| Nd            | <u>GTATGACACAGCAA</u> TAGTGATTTTTTTTTTTGGGTACCGTACTGAGATG<br><u>AGAT</u>    |
| BS            | TTTTTTTTTTGACAAACAAAGGA                                                     |
| RS            | TCCTTTGTTTGTCAAAAAAAAAAAA                                                   |

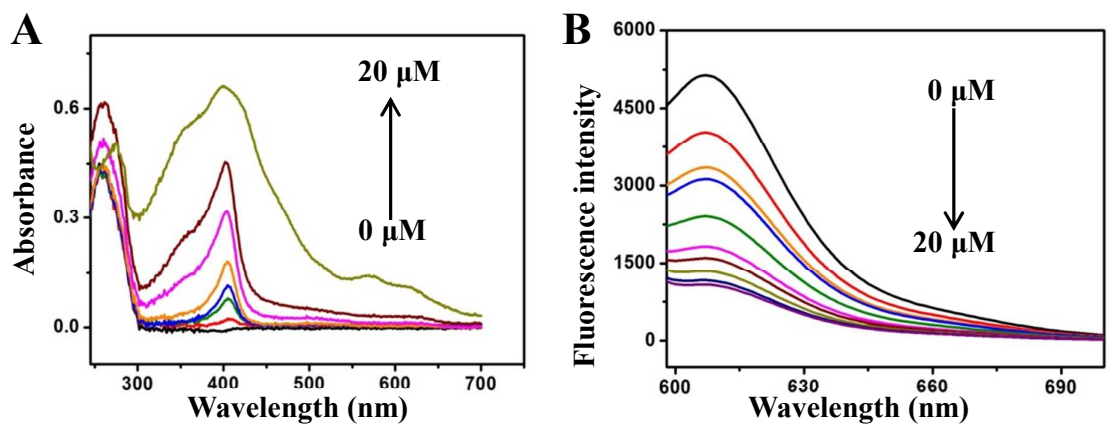

**Figure S1.** UV-vis absorbance (A) and fluorescence (B) spectra of SGMB in the presence of increased hemin ranging from 0  $\mu\text{M}$  to 20  $\mu\text{M}$ . The concentrations of SGMB,  $\text{K}^+$  were 1  $\mu\text{M}$ , 25 mM, respectively.

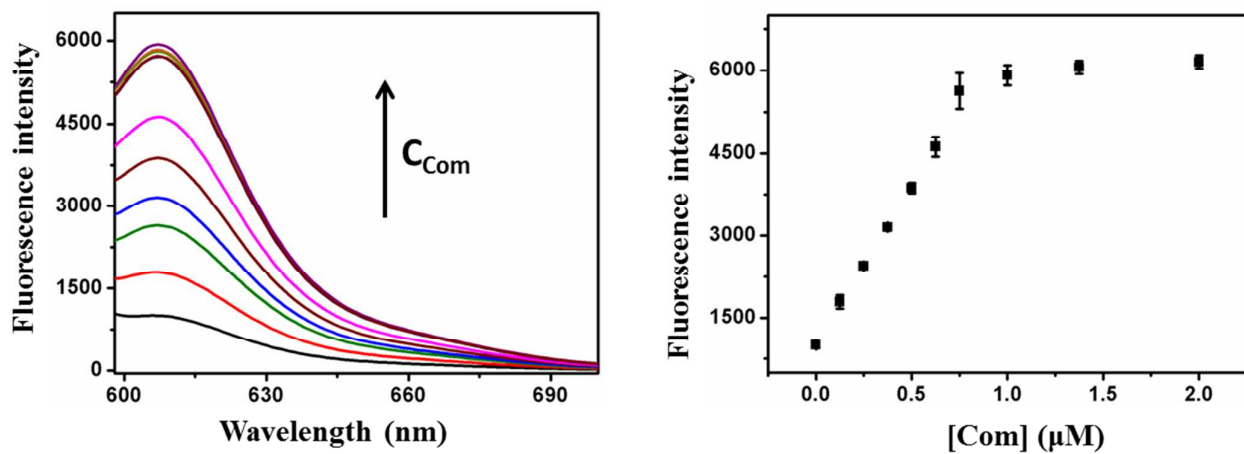

**Figure S2.** Fluorescence (A) spectra and fluorescence intensity changes (B) of SGMB in the presence of increased complementary strands (S1' as an example) ranging from 0  $\mu\text{M}$  to 2  $\mu\text{M}$ . The concentrations of SGMB,  $\text{K}^+$ , Hemin were 1  $\mu\text{M}$ , 25 mM, 10  $\mu\text{M}$  respectively.

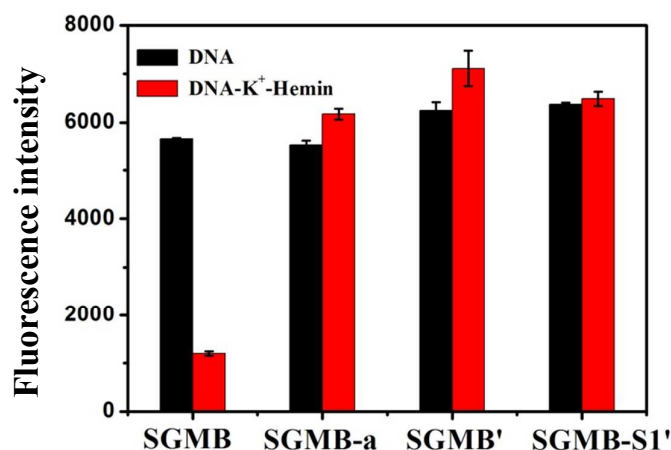

**Figure S3.** PET effect of different DNA sequences. The fluorescence intensity of SGMB with different DNA sequences in the absence and presence of K<sup>+</sup> and hemin. The concentrations of SGMB, K<sup>+</sup> were 1  $\mu$ M, 25 mM, respectively.

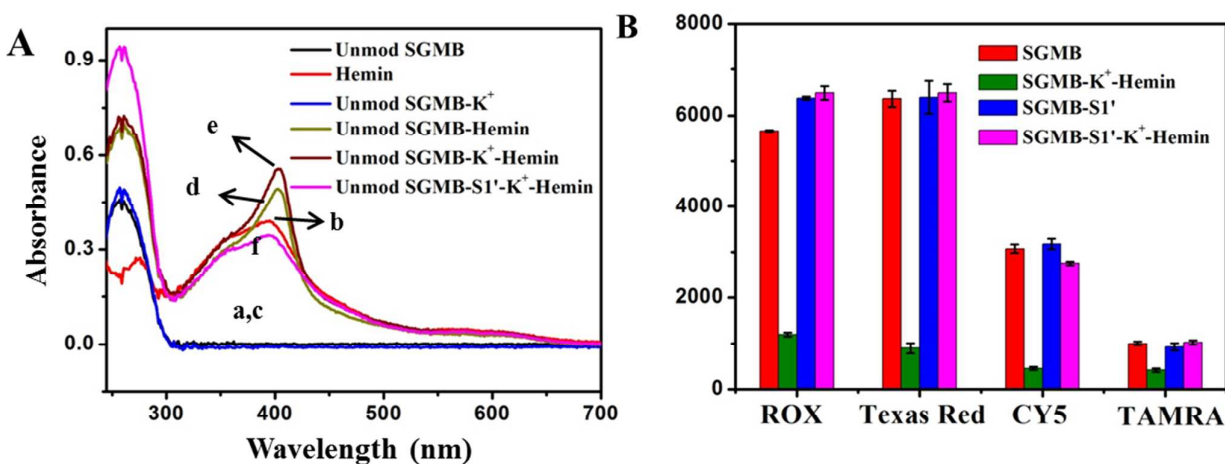

**Figure S4.** The effect of different fluorescent dyes for the produce and suppression of PET effect. (A) UV-vis absorbance spectra of (a) Unmodified SGMB, (b) hemin, (c) Unmodified SGMB-K<sup>+</sup>, (d) Unmodified SGMB-hemin, (e) Unmodified SGMB-K<sup>+</sup>-hemin, and (f) Unmodified SGMB-S1'-K<sup>+</sup>-Hemin. (B) The fluorescence intensity of SGMB (red bar), SGMB-K<sup>+</sup>-hemin (olive bar), SGMB-S1' (blue bar), and SGMB-S1'-K<sup>+</sup>-Hemin (magenta bar). The SGMBs modified by different fluorescent dye, such as ROX, Texas Red, CY5 and TAMRA. The concentrations of SGMBs, K<sup>+</sup> were 1  $\mu$ M, 25 mM, respectively.

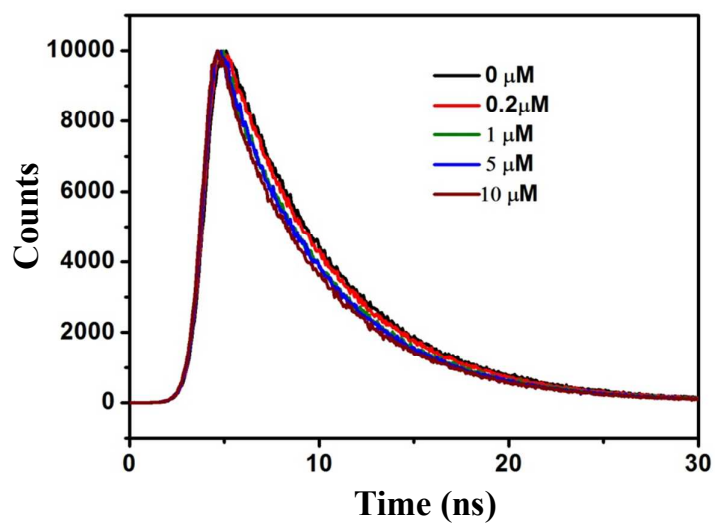

**Figure S5.** The fluorescence lifetime of SGMB in the presence of increased Hemin. The concentrations of SGMB,  $\text{K}^+$  were 1  $\mu\text{M}$ , 25 mM, respectively.



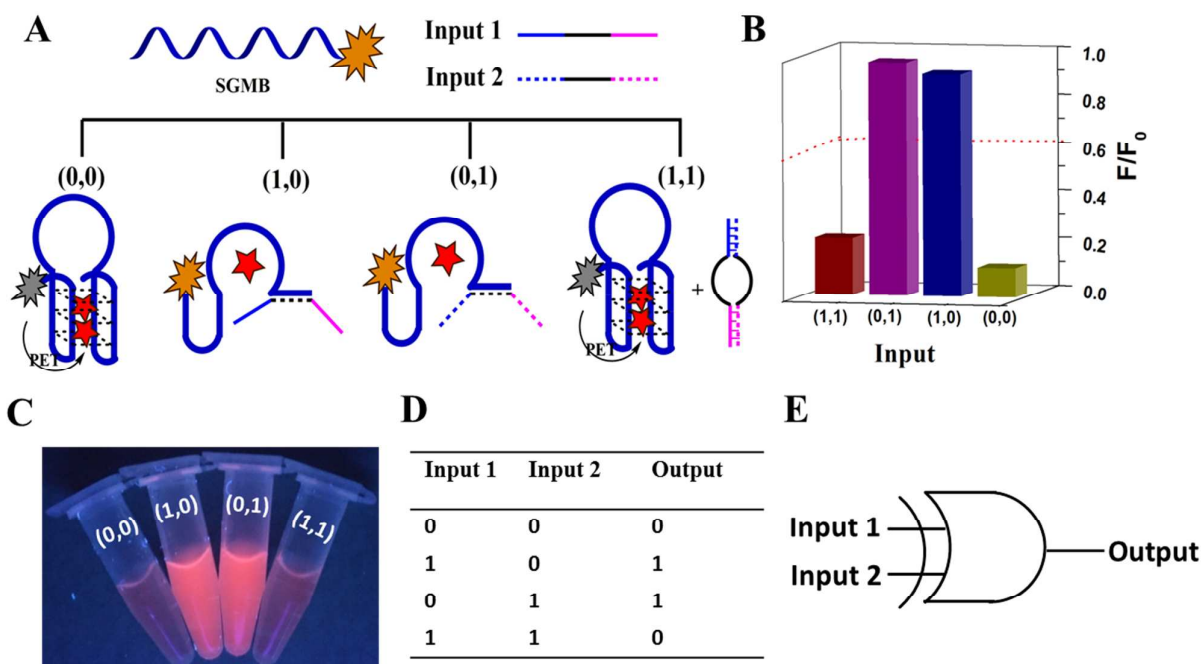

**Figure S7.** The binary “XOR” logic gate. (A) Schematic illustration of the operational design of the “XOR” gate. (B) The  $F/F_0$  608 of ROX. (C) The corresponding fluorescence image (D) The truth table of the “XOR” logic gate. (E) Electronic equivalent circuitry. The concentrations of SGMB,  $K^+$  were 1  $\mu$ M, 25 mM, respectively.

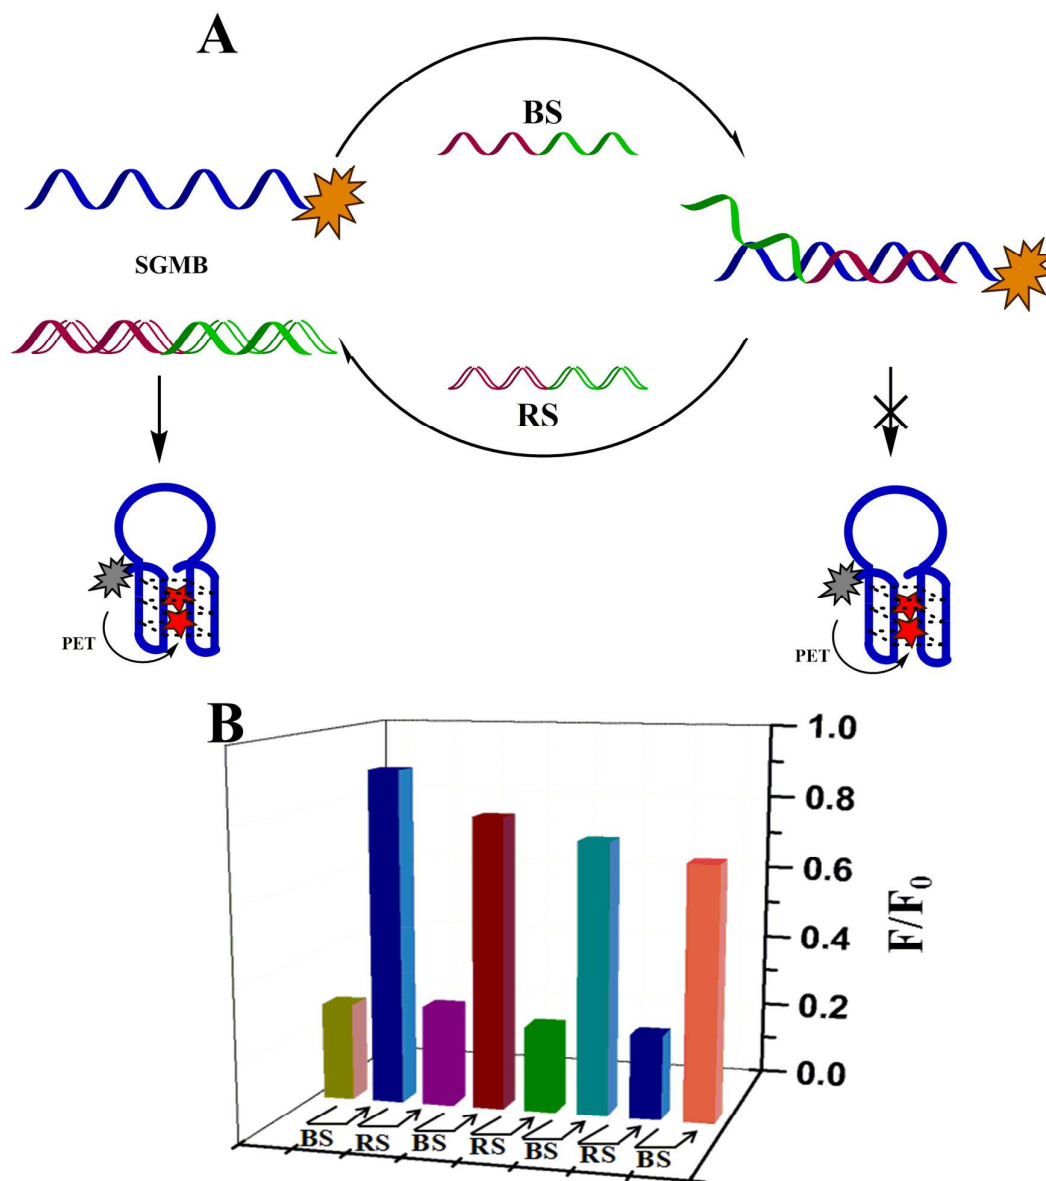

**Figure S8.** The set-reset function of SGMB probe. (A) The SGMB was been blocked by binding with blocking strands (BS), and was released by the detachment of releasing strands (RS), accompanied by alternately changed fluorescence intensity ratio (B).



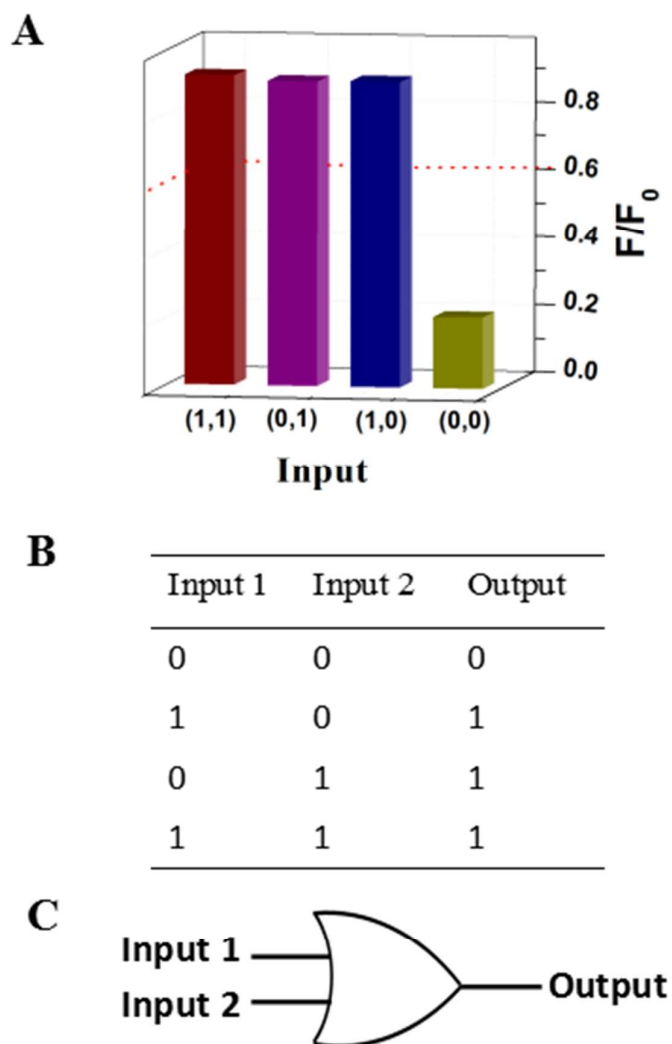

**Figure S9.** The “OR” logic operation in human blood serum. (A) The  $F/F_0$  of ROX at 608 nm. (B) The truth table of “OR” logic gate. (C) Electronic equivalent circuitry. The concentrations of SGMB,  $K^+$  were 1  $\mu$ M, 25 mM, respectively.

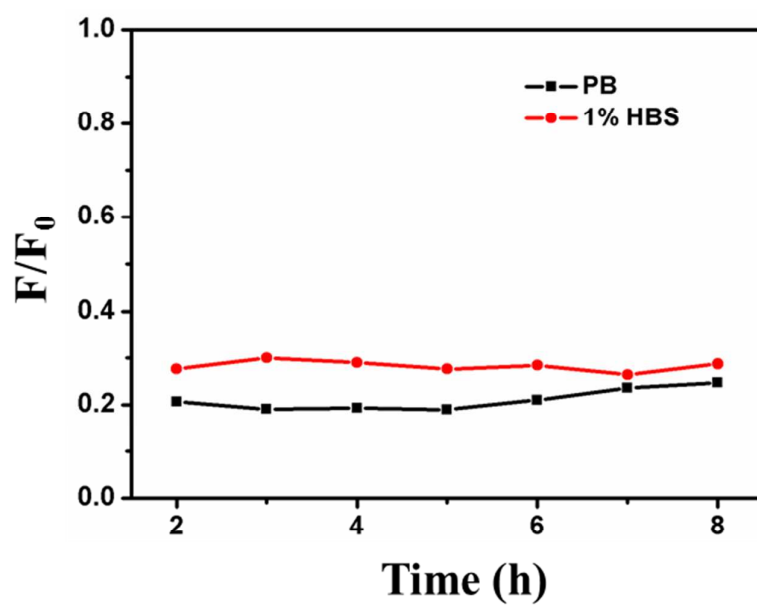

**Figure S10.** The stability of the SGMB platform in serum. Timecourse curvilinear of the fluorescence intensity ratio in PB (black line) and human blood serum (red line).
